# Supplementary material
Source: PubMed Central journal article supplement (PMC4018237)

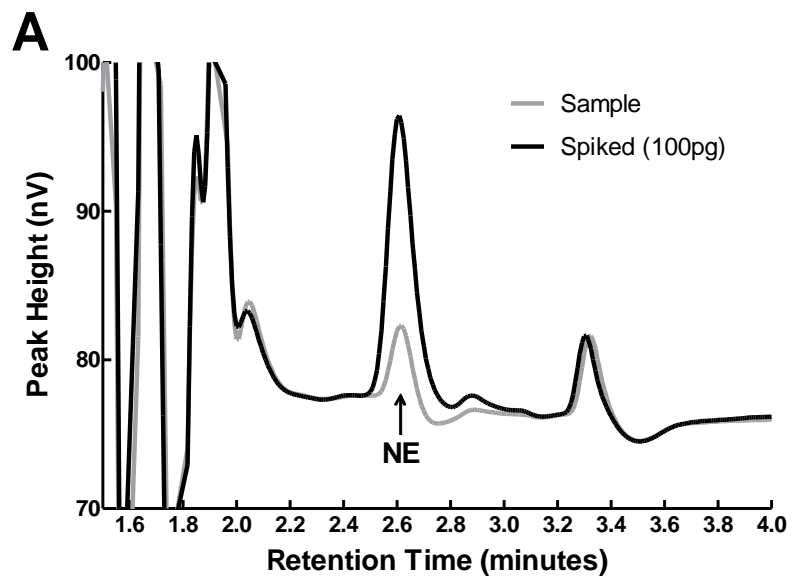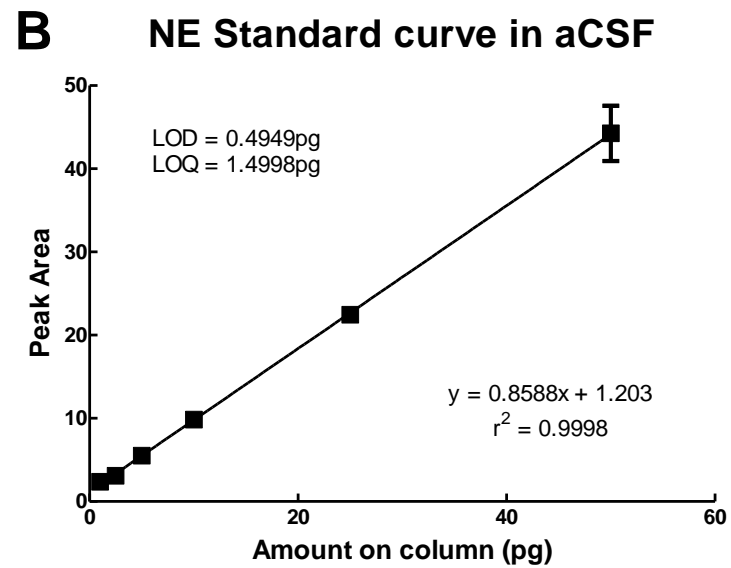

Supplement: NIHMS571347-supplement-Supplemtary_Fig__1.pdf [file NIHMS571347-supplement-Supplemtary_Fig__1.pdf]
